# Supplementary material
Source: PubMed Central journal article supplement (PMC8714286)
Supplement: ocab222_supplementary_appendix.pdf [file ocab222_supplementary_appendix.pdf]

# Appendix

## A Main Theorem

Our model is set up as follows:

1. For the  $i$ th subject, the true response  $Y_i$  depends on the covariates  $\mathbf{X}_i$  following

$$Y_i | \mathbf{X} \sim \text{Bin} \left\{ \frac{\exp(\mathbf{X}_i^\top \boldsymbol{\beta}_0)}{1 + \exp(\mathbf{X}_i^\top \boldsymbol{\beta}_0)} \mid \mathbf{X} \right\}.$$

2. The surrogate outcome  $S_i$  depends on  $Y_i$  following

$$\mathbb{P}(S_i = 1 \mid Y_i = 1) = p_1, \mathbb{P}(S_i = 0 \mid Y_i = 0) = p_0,$$

where  $p_1$  and  $p_0$  are two constants.

3. To obtain the subset  $\mathcal{V}$ , the sampling procedure  $\mathbb{I}(i \in \mathcal{V})$  depends on  $S_i$  following

$$\mathbb{P}(i \in \mathcal{V} \mid S_i = 1) = h_1, \mathbb{P}(i \in \mathcal{V} \mid S_i = 0) = h_0,$$

where  $h_1$  and  $h_0$  are two preset constants.

Additionally, define  $w_i = h_1 S_i + h_0(1 - S_i)$ , the “biased” log-likelihood  $l_i(\boldsymbol{\beta})$  and the “weighted” misspecified log-likelihood  $g'_i(\boldsymbol{\gamma})$ :

$$l_i(\boldsymbol{\beta}) = Y_i(c + \mathbf{X}_i \boldsymbol{\beta}) - \log\{1 + \exp(c + \mathbf{X}_i \boldsymbol{\beta})\} \text{ and } g'_i(\boldsymbol{\gamma}) = w_i [S_i \mathbf{X}_i \boldsymbol{\gamma} - \log\{1 + \exp(\mathbf{X}_i \boldsymbol{\gamma})\}]$$

Then

$$\begin{aligned}\nabla l_i(\boldsymbol{\beta}) &= \left\{ Y_i - \frac{\exp(c + \mathbf{X}_i^\top \boldsymbol{\beta})}{1 + \exp(c + \mathbf{X}_i^\top \boldsymbol{\beta})} \right\} \mathbf{X}_i, \quad \nabla^2 l_i(\boldsymbol{\beta}) = \left[ \frac{\exp(c + \mathbf{X}_i^\top \boldsymbol{\beta})}{\{1 + \exp(c + \mathbf{X}_i^\top \boldsymbol{\beta})\}^2} \right] \mathbf{X}_i \mathbf{X}_i^\top \\ \nabla g'_i(\boldsymbol{\gamma}) &= w_i \left\{ S_i - \frac{\exp(\mathbf{X}_i^\top \boldsymbol{\gamma})}{1 + \exp(\mathbf{X}_i^\top \boldsymbol{\gamma})} \right\} \mathbf{X}_i, \quad \nabla^2 g'_i(\boldsymbol{\gamma}) = w_i \frac{\exp(\mathbf{X}_i^\top \boldsymbol{\gamma})}{\{1 + \exp(\mathbf{X}_i^\top \boldsymbol{\gamma})\}^2} \mathbf{X}_i \mathbf{X}_i^\top.\end{aligned}$$

In addition to the model setting, we further require some regularity conditions to ensure the existence of our estimator.

**Assumption 1.**

1.  $\mathbb{E}(\|\mathbf{X}_i\|_2^2) < \infty$  for  $i = 1, \dots, N$ ;
2. The unique solutions to  $\mathbb{E}_{\boldsymbol{\beta}}\{\nabla l_i(\boldsymbol{\beta})\} = \mathbf{0}$  and  $\mathbb{E}_{\boldsymbol{\gamma}}\{\nabla g'(S_i, \mathbf{X}_i; \boldsymbol{\gamma})\} = \mathbf{0}$  exist.

These assumptions are very mild, and hold in most of common models (linear models, generalized linear models, etc.).

**Theorem 1.** For the MLE estimators  $\widehat{\boldsymbol{\beta}}_{\mathcal{V}}$ ,  $\widehat{\boldsymbol{\gamma}}_{\mathcal{V}}$  and  $\widehat{\boldsymbol{\gamma}}_{\mathcal{F}}$ , consider the combined estimator and the estimated variance

$$\begin{aligned}\widehat{\boldsymbol{\beta}}_A &= \widehat{\boldsymbol{\beta}}_{\mathcal{V}} - \widehat{\mathbf{H}}_Y^{-1} \widehat{\mathbf{G}}_{SY} \widehat{\mathbf{G}}_S^{-1} \widehat{\mathbf{H}}_S (\widehat{\boldsymbol{\gamma}}_{\mathcal{V}} - \widehat{\boldsymbol{\gamma}}_{\mathcal{F}}) \\ \widehat{\text{var}}(\widehat{\boldsymbol{\beta}}_A) &= \widehat{\mathbf{H}}_Y^{-1} - (1 - |\mathcal{V}| |\mathcal{F}|^{-1}) \widehat{\mathbf{H}}_Y^{-1} \widehat{\mathbf{G}}_{SY} \widehat{\mathbf{G}}_S^{-1} \widehat{\mathbf{G}}_{SY}^\top \widehat{\mathbf{H}}_Y^{-1},\end{aligned}$$

where

$$\begin{aligned}\widehat{\mathbf{H}}_Y &= |\mathcal{V}|^{-1} \sum_{i \in \mathcal{V}} \nabla^2 l_i(\widehat{\boldsymbol{\beta}}_{\mathcal{V}}), & \widehat{\mathbf{H}}_S &= |\mathcal{F}|^{-1} \sum_{i \in \mathcal{F}} \nabla^2 g'_i(\widehat{\boldsymbol{\gamma}}_{\mathcal{F}}) \\ \widehat{\mathbf{G}}_{SY} &= |\mathcal{V}|^{-1} \sum_{i \in \mathcal{V}} \nabla l_i(\widehat{\boldsymbol{\beta}}_{\mathcal{V}}) \nabla g'_i{}^\top(\widehat{\boldsymbol{\gamma}}_{\mathcal{F}}), & \widehat{\mathbf{G}}_S &= |\mathcal{F}|^{-1} \sum_{i \in \mathcal{F}} \nabla g'_i(\widehat{\boldsymbol{\gamma}}_{\mathcal{F}}) \nabla g'_i{}^\top(\widehat{\boldsymbol{\gamma}}_{\mathcal{F}}).\end{aligned}$$

Then suppose  $\widehat{\mathbf{H}}_Y^{-1}$  and  $\widehat{\mathbf{G}}_S^{-1}$  exist almost surely, under Assumption 1

$$|\mathcal{V}|^{1/2} \{\widehat{\text{var}}(\widehat{\boldsymbol{\beta}}_A)\}^{-1/2} \left\{ \widehat{\boldsymbol{\beta}}_A - \boldsymbol{\beta}_0 - \begin{pmatrix} c \\ \mathbf{0} \end{pmatrix} \right\} \rightsquigarrow N(\mathbf{0}, \mathbf{I}),$$

where  $c$  is a constant.

*Proof.*

## Estimating Equation for $S_i$

Recall that the working estimation equation is  $\nabla g(S_i, \mathbf{X}_i; \gamma)$ . Then in the selected subsamples, we are solving the new equation:

$$\mathbb{E}\{\nabla g(S_i, \mathbf{X}_i; \gamma)\mathbb{I}(i \in \mathcal{V})\} = \mathbf{0}$$

Suppose the solution  $\gamma'_0$  exists, denoted by  $\hat{\gamma}_{\mathcal{F}}$  and  $\hat{\gamma}_{\mathcal{V}}$  the empirical solutions to

$$|\mathcal{F}|^{-1} \sum_{i \in \mathcal{F}} \nabla g(S_i, \mathbf{X}_i; \gamma) \mathbb{P}(i \in \mathcal{V}) = 0 \text{ and } |\mathcal{V}|^{-1} \sum_{i \in \mathcal{V}} \nabla g(S_i, \mathbf{X}_i; \gamma) = 0.$$

We have  $\|\hat{\gamma}_{\mathcal{F}} - \gamma'_0\| = o_p(1)$  and  $\|\hat{\gamma}_{\mathcal{V}} - \gamma'_0\| = o_p(1)$ . Hence, for  $i \in \mathcal{F}$ , define the new estimating equation

$$\nabla g'_i(\gamma) = \nabla g'(S_i, \mathbf{X}_i; \gamma) = \nabla g(S_i, \mathbf{X}_i; \gamma) \mathbb{P}(i \in \mathcal{V}).$$

Specifically, in our case

$$\nabla g'_i(\gamma_0) = w_i \left\{ S_i - \frac{\exp(\mathbf{X}_i^\top \gamma'_0)}{1 + \exp(\mathbf{X}_i^\top \gamma'_0)} \right\} \mathbf{X}_i, \quad \nabla^2 g'_i(\gamma_0) = w_i \frac{\exp(\mathbf{X}_i^\top \gamma'_0)}{\{1 + \exp(\mathbf{X}_i^\top \gamma'_0)\}^2} \mathbf{X}_i \mathbf{X}_i^\top,$$

where  $w_i = h_1 s_i + h_0(1 - s_i)$ . Additionally, although not directly related, the detailed property regarding the misspecified models can be found in White (1982).

## Biased Estimator for $\beta_0$

On the other hand, given the biased validation set  $\mathcal{V}$ , for  $\beta_0$  estimation,

$$\begin{aligned} & \mathbb{P}(Y_i = 1 \mid i \in \mathcal{V}) \\ &= \frac{\mathbb{P}(Y_i = 1, i \in \mathcal{V})}{\mathbb{P}(i \in \mathcal{V})} = \frac{\mathbb{P}(Y_i = 1, S_i = 1, i \in \mathcal{V}) + \mathbb{P}(Y_i = 1, S_i = 0, i \in \mathcal{V})}{\mathbb{P}(i \in \mathcal{V})} \\ &= \frac{\mathbb{P}(Y_i = 1, S_i = 1) \mathbb{P}(i \in \mathcal{V} \mid \mathbf{S}_1) + \mathbb{P}(Y_i = 1, S_i = 0) \mathbb{P}(i \in \mathcal{V} \mid \mathbf{S}_0)}{\mathbb{P}(i \in \mathcal{V} \mid S_i = 1) \mathbb{P}(S_i = 1) + \mathbb{P}(i \in \mathcal{V} \mid S_i = 0) \mathbb{P}(S_i = 0)} \\ &= \frac{p_1 h_1 \mathbb{P}(Y_i = 1) + (1 - p_1) h_0 \mathbb{P}(Y_i = 1)}{h_1 [p_1 \mathbb{P}(Y_i = 1) + (1 - p_0) \{1 - \mathbb{P}(Y_i = 1)\}] + h_0 [p_0 \{1 - \mathbb{P}(Y_i = 1)\} + (1 - p_1) \mathbb{P}(Y_i = 1)]} \\ &= \frac{\{p_1 h_1 + (1 - p_1) h_0\} \exp(\mathbf{X}_i^\top \beta_0)}{h_1 \{p_1 \exp(\mathbf{X}_i^\top \beta_0) + (1 - p_0)\} + h_0 \{p_0 + (1 - p_1) \exp(\mathbf{X}_i^\top \beta_0)\}} \\ &= \frac{\exp(c + \mathbf{X}_i^\top \beta_0)}{1 + \exp(c + \mathbf{X}_i^\top \beta_0)}, \end{aligned}$$

where  $c = \log[\{h_1 p_1 + h_0(1 - p_1)\}\{h_1(1 - p_0) + h_0 p_0\}^{-1}]$ . Let  $l_i(\boldsymbol{\beta})$  be the log-likelihood of  $Y_i$ , then

$$\nabla l_i(\boldsymbol{\beta}) = \left\{ Y_i - \frac{\exp(c + \mathbf{X}_i^\top \boldsymbol{\beta})}{1 + \exp(c + \mathbf{X}_i^\top \boldsymbol{\beta})} \right\} \mathbf{X}_i, \quad \nabla^2 l_i(\boldsymbol{\beta}) = \left[ \frac{\exp(c + \mathbf{X}_i^\top \boldsymbol{\beta})}{\{1 + \exp(c + \mathbf{X}_i^\top \boldsymbol{\beta})\}^2} \right] \mathbf{X}_i \mathbf{X}_i^\top$$

Therefore, we obtain the MLE estimator  $\widehat{\boldsymbol{\beta}}_{\mathcal{V}}$ ,

$$n^{1/2} \left\{ \widehat{\boldsymbol{\beta}}_{\mathcal{V}} - \boldsymbol{\beta}_0 - \begin{pmatrix} c \\ \mathbf{0} \end{pmatrix} \right\} = n^{1/2} \{ \mathbf{H}'_Y(\widehat{\boldsymbol{\beta}}_{\mathcal{V}}) \}^{-1} \nabla \bar{l}_{\mathcal{V}}(\boldsymbol{\beta}_0) \rightsquigarrow N(\mathbf{0}, \mathbf{G}_y^{-1}(\boldsymbol{\beta}_0)),$$

where  $\nabla \bar{l}_{\mathcal{V}}(\boldsymbol{\beta}) = |\mathcal{V}|^{-1} \sum_{i \in \mathcal{V}} \nabla l_i(\boldsymbol{\beta})$  and  $\mathbf{H}'_Y(\widehat{\boldsymbol{\beta}}_{\mathcal{V}}) = \int_0^1 \nabla^2 \bar{l}_{\mathcal{V}}\{\widehat{\boldsymbol{\beta}}_{\mathcal{V}} + t(\widehat{\boldsymbol{\beta}}_{\mathcal{V}} - \boldsymbol{\beta}_0)\} dt$ . Additionally,  $\mathbf{G}_y(\boldsymbol{\beta}_0) = \mathbb{E}\{\nabla^2 l_i(\boldsymbol{\beta}_0)\}$  is the Fisher information matrix with respect to  $\boldsymbol{\beta}_0$ .

Combining all results, we can apply the formula in Chen and Chen (2000) and define

$$\begin{aligned} \widehat{\boldsymbol{\beta}}_A &= \widehat{\boldsymbol{\beta}}_{\mathcal{V}} - \widehat{\mathbf{H}}_Y^{-1} \widehat{\mathbf{G}}_{SY} \widehat{\mathbf{G}}_S^{-1} \widehat{\mathbf{H}}_S (\widehat{\boldsymbol{\gamma}}_{\mathcal{V}} - \widehat{\boldsymbol{\gamma}}_{\mathcal{F}}) \\ \widehat{\text{var}}(\widehat{\boldsymbol{\beta}}_A) &= \widehat{\mathbf{H}}_Y^{-1} - (1 - |\mathcal{V}| |\mathcal{F}|^{-1}) \widehat{\mathbf{H}}_Y^{-1} \widehat{\mathbf{G}}_{SY} \widehat{\mathbf{G}}_S^{-1} \widehat{\mathbf{G}}_{SY}^\top \widehat{\mathbf{H}}_Y^{-1}, \end{aligned}$$

where

$$\begin{aligned} \widehat{\mathbf{H}}_Y &= |\mathcal{V}|^{-1} \sum_{i \in \mathcal{V}} \nabla^2 l_i(\widehat{\boldsymbol{\beta}}_{\mathcal{V}}), & \widehat{\mathbf{H}}_S &= |\mathcal{F}|^{-1} \sum_{i \in \mathcal{F}} \nabla^2 g'_i(\widehat{\boldsymbol{\gamma}}_{\mathcal{F}}) \\ \widehat{\mathbf{G}}_{SY} &= |\mathcal{V}|^{-1} \sum_{i \in \mathcal{V}} \nabla l_i(\widehat{\boldsymbol{\beta}}_{\mathcal{V}}) \nabla g'_i{}^\top(\widehat{\boldsymbol{\gamma}}_{\mathcal{F}}), & \widehat{\mathbf{G}}_S &= |\mathcal{F}|^{-1} \sum_{i \in \mathcal{F}} \nabla g'_i(\widehat{\boldsymbol{\gamma}}_{\mathcal{F}}) \nabla g'_i{}^\top(\widehat{\boldsymbol{\gamma}}_{\mathcal{F}}). \end{aligned}$$

By the Slutsky's theorem, we have

$$|\mathcal{V}|^{1/2} \{ \widehat{\text{var}}(\widehat{\boldsymbol{\beta}}_A) \}^{-1/2} \left\{ \widehat{\boldsymbol{\beta}}_A - \boldsymbol{\beta}_0 - \begin{pmatrix} c \\ \mathbf{0} \end{pmatrix} \right\} \rightsquigarrow N(\mathbf{0}, \mathbf{I}).$$

□

## B Group Assignment with Fixed Total Validation Size

Recall that our setting gives

$$\mathbb{P}(Y_i = 1 \mid i \in \mathcal{V}) = \frac{\exp(c + \mathbf{X}_i^\top \boldsymbol{\beta}_0)}{1 + \exp(c + \mathbf{X}_i^\top \boldsymbol{\beta}_0)},$$

where  $c = \log [\{h_1 p_1 + h_0(1 - p_1)\}\{h_1(1 - p_0) + h_0 p_0\}^{-1}]$ . Let  $\rho_0$  be the marginal prevalence of  $Y$ . Under the null hypothesis,

$$\rho_0 = \frac{\exp(b_0)}{1 + \exp(b_0)},$$

where  $b_0$  is the intercept term. We hope  $\mathbb{P}(Y_i = 1 \mid i \in \mathcal{V}) = 0.5$  in order to achieve a balanced comparison within  $\mathcal{V}$ . Therefore,  $c + b_0 = 0$  and

$$\log \left\{ \frac{h_1 p_1 + h_0(1 - p_1)}{h_1(1 - p_0) + h_0 p_0} \right\} + \log \left( \frac{\rho_0}{1 - \rho_0} \right) = 0.$$

On the other hand, when the total validation size  $n$  is fixed, let  $N_k = \sum_{i \in \mathcal{F}} \mathbb{I}(S_i = k)$  for  $k = 1, 2$ ,  $h_1 = n_1 N_1^{-1}$  and  $h_0 = (n - n_1) N_0^{-1}$ . Consequently,

$$\begin{aligned} \frac{n_1 N_1^{-1} p_1 + (n - n_1) N_0^{-1} (1 - p_1)}{n_1 N_1^{-1} (1 - p_0) + (n - n_1) N_0^{-1} p_0} \frac{\rho_0}{1 - \rho_0} &= 1 \\ \frac{n_1 \{N_1^{-1} p_1 - N_0^{-1} (1 - p_1)\} \rho_0 + n N_0^{-1} (1 - p_1) \rho_0}{n_1 \{N_1^{-1} (1 - p_0) - N_0^{-1} p_0\} (1 - \rho_0) + n N_0^{-1} p_0 (1 - \rho_0)} &= 1. \end{aligned}$$

This leads to our conclusion:

$$n_1 = \frac{n N_1 \{p_0(1 - \rho_0) - (1 - p_1)\rho_0\}}{\{N_0 p_1 - N_1(1 - p_1)\} \rho_0 - \{N_0(1 - p_0) - N_1 p_0\} (1 - \rho_0)}. \quad (1)$$

However, in rare disease studies, often,  $\rho_0$  is so low that the required  $n_1$  goes far beyond  $n$ . In this case, we hope to make  $c$  as large as possible:

$$n_1 = \arg \max_{n_1 \in [0, n]} \frac{n_1 \{N_0 p_1 - N_1(1 - p_1)\} + n N_1(1 - p_1)}{n_1 \{N_0(1 - p_0) - N_1 p_0\} + n N_1 p_0} \quad (2)$$

Especially, when both  $\rho_0$  and  $1 - p_1 \rightarrow 0$ , we can set  $n_1 = n$  and  $n_0 = 0$  to select as many cases as possible.

## C Additional Simulation Results

This section provides additional simulation results of the model specified in Section 3.1 when  $p_1 = 60\%$  and  $80\%$ . Box plots of MSE and empirical average coverage probabilities are presented.

Additional simulation results for the power comparisons with prevalence of 3%/5% are

Table 2: Empirical average coverage probabilities at 95% level for  $p_1 = 60\%$ . Different combinations of prevalence and specificity are demonstrated.

| Prevalence (%) | $p_0(\%)$ | Oracle | Ori-Unif | Aug-Unif | Ori-Bias | OSCA |
|----------------|-----------|--------|----------|----------|----------|------|
| 5              | 60        | 95     | 95       | 94       | 96       | 95   |
|                | 80        | 95     | 95       | 95       | 95       | 95   |
|                | 90        | 95     | 95       | 94       | 95       | 94   |
| 10             | 60        | 95     | 95       | 95       | 95       | 95   |
|                | 80        | 95     | 95       | 95       | 95       | 95   |
|                | 90        | 95     | 95       | 95       | 95       | 94   |
| 30             | 60        | 95     | 95       | 95       | 95       | 95   |
|                | 80        | 95     | 95       | 95       | 95       | 95   |
|                | 90        | 95     | 95       | 95       | 95       | 94   |
| 50             | 60        | 95     | 95       | 95       | 95       | 95   |
|                | 80        | 95     | 95       | 95       | 95       | 95   |
|                | 90        | 95     | 95       | 95       | 95       | 94   |

Table 3: Empirical average coverage probabilities at 95% level for  $p_1 = 80\%$ . Different combinations of prevalence and specificity are demonstrated.

| Prevalence (%) | $p_0(\%)$ | Oracle | Ori-Unif | Aug-Unif | Ori-Bias | OSCA |
|----------------|-----------|--------|----------|----------|----------|------|
| 5              | 60        | 95     | 95       | 94       | 95       | 95   |
|                | 80        | 95     | 95       | 94       | 95       | 95   |
|                | 90        | 95     | 95       | 94       | 95       | 94   |
| 10             | 60        | 95     | 95       | 95       | 95       | 95   |
|                | 80        | 95     | 95       | 95       | 95       | 94   |
|                | 90        | 95     | 95       | 94       | 95       | 94   |
| 30             | 60        | 95     | 95       | 95       | 95       | 95   |
|                | 80        | 95     | 95       | 95       | 95       | 95   |
|                | 90        | 95     | 95       | 95       | 95       | 95   |
| 50             | 60        | 95     | 95       | 95       | 95       | 95   |
|                | 80        | 95     | 95       | 95       | 95       | 95   |
|                | 90        | 95     | 95       | 95       | 95       | 95   |

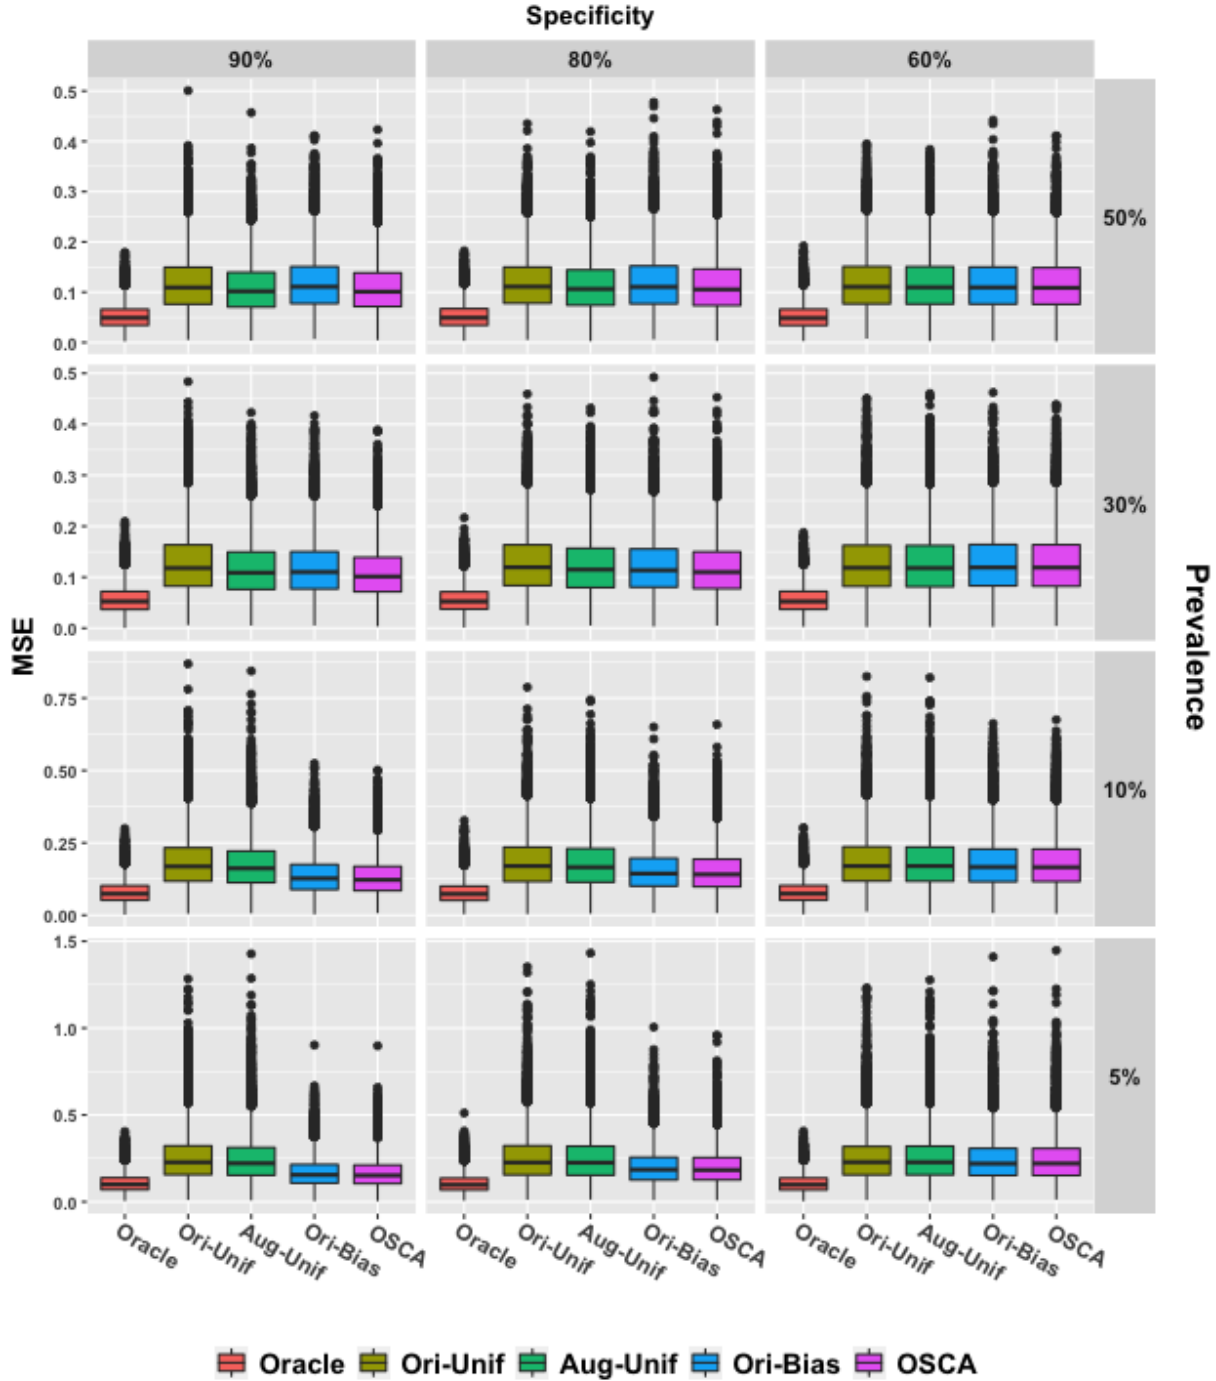

Figure 6: Box plots of the empirical MSE. Five methods are compared with fixed  $p_1 = 60\%$ . Each column gives results at different specificities (90%, 80% and 60%) and each row for different prevalence. The red, the gold, the green, the blue and the purple boxes respectively stand for the oracle method, the uniform-sampling method, the Aug-Unif method, the original biased-sampling method and the proposed method.

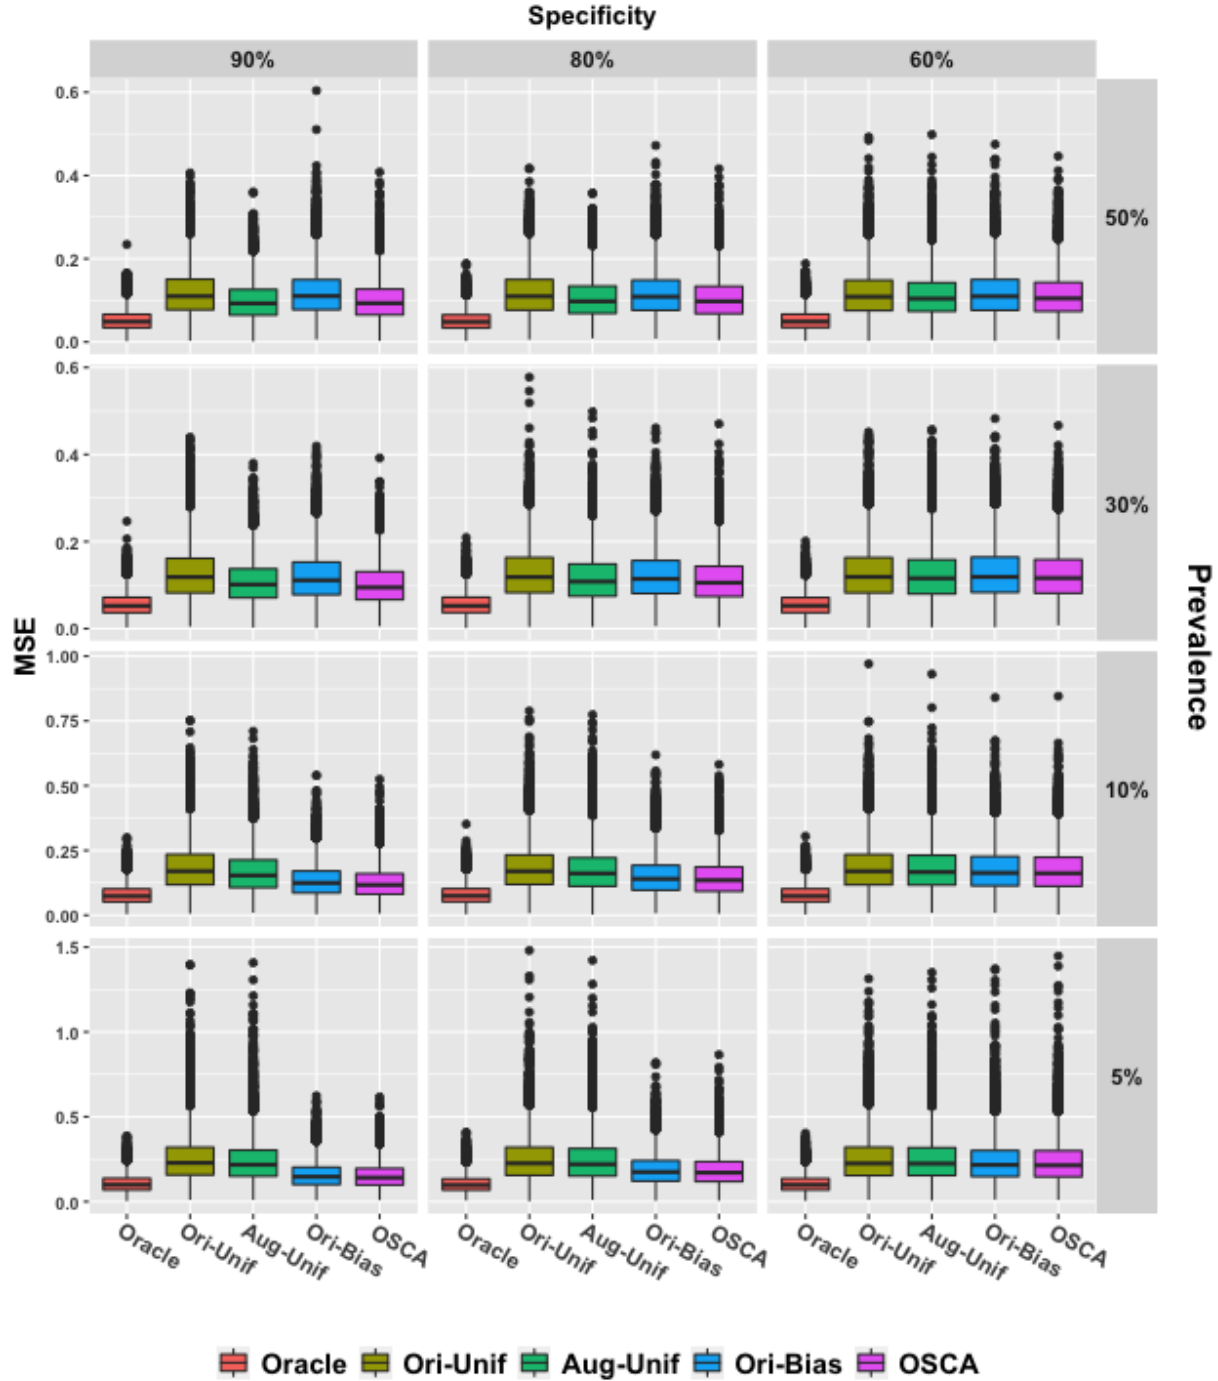

Figure 7: Box plots of the empirical MSE. Five methods are compared with fixed  $p_1 = 80\%$ . Each column gives results at different specificities (90%, 80% and 60%) and each row for different prevalence. The red, the gold, the green, the blue and the purple boxes respectively stand for the oracle method, the uniform-sampling method, the Aug-Unif method, the original biased-sampling method and the proposed method.



given in Figure 8.

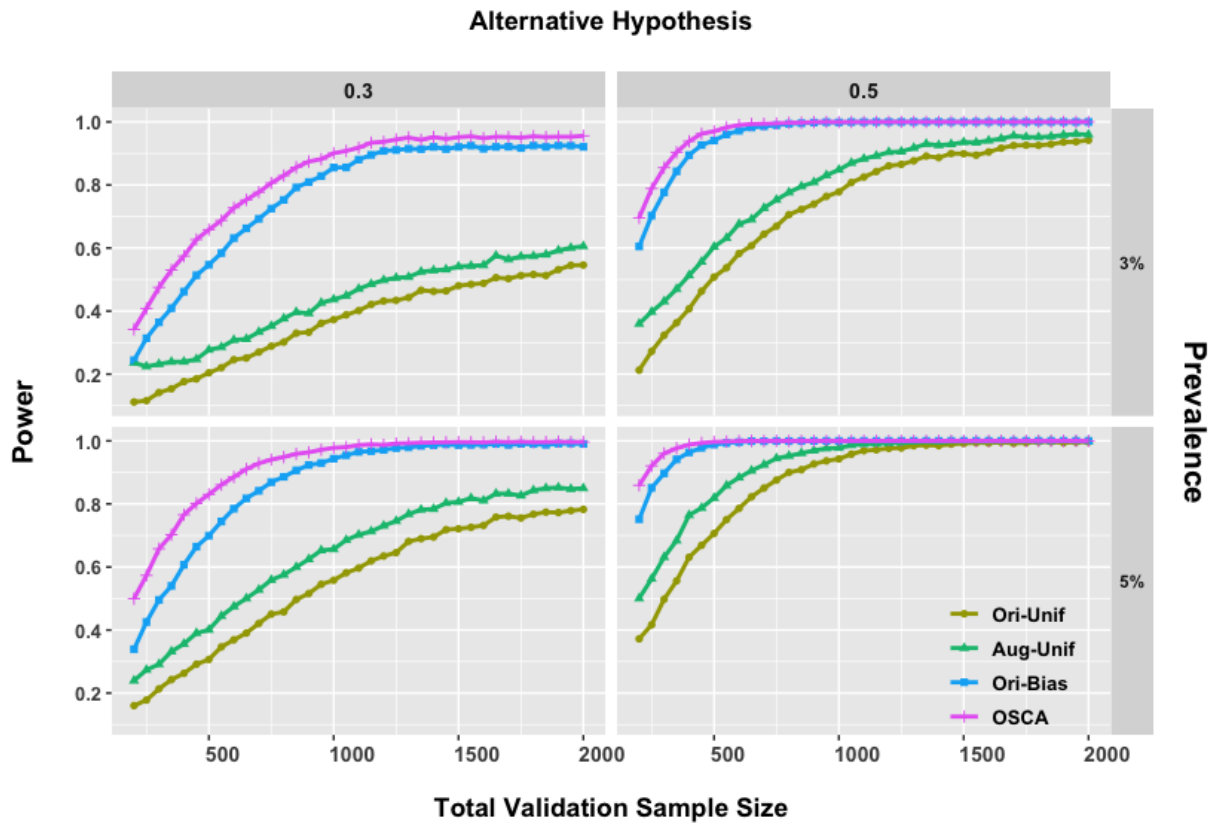

Figure 8: Power comparisons under different alternative hypotheses. Total validation sample size was varied from 200 to 2000. Combinations of prevalence at 3%/5% and alternative hypotheses  $\beta_1 = 0.3/0.5$  were presented. In all panels, gold, green, blue, and purple lines stand for Ori-Unif, Aug-Unif, Ori-Bias and OSCA respectively.

## References

- Chen, Y. and Chen, H. (2000). A unified approach to regression analysis under double-sampling designs. *Journal of the Royal Statistical Society. Series B (Statistical Methodology)*, 62(3):449–460.
- White, H. (1982). Maximum likelihood estimation of misspecified models. *Econometrica*, 50(1):1–25.

Table 4: Empirical average coverage probabilities at 95% level for  $p_1 = 90\%$ . Different combinations of prevalence and specificity are demonstrated.

| Prevalence (%) | $p_0(\%)$ | Oracle | Ori-Unif | Aug-Unif | Ori-Bias | OSCA |
|----------------|-----------|--------|----------|----------|----------|------|
| 5              | 60        | 95     | 95       | 95       | 96       | 95   |
|                | 80        | 95     | 95       | 94       | 95       | 95   |
|                | 90        | 95     | 95       | 94       | 96       | 94   |
| 10             | 60        | 95     | 95       | 95       | 95       | 95   |
|                | 80        | 95     | 95       | 95       | 95       | 95   |
|                | 90        | 95     | 95       | 94       | 95       | 94   |
| 30             | 60        | 95     | 95       | 95       | 95       | 95   |
|                | 80        | 95     | 95       | 95       | 95       | 95   |
|                | 90        | 95     | 95       | 94       | 95       | 94   |
| 50             | 60        | 95     | 95       | 95       | 95       | 95   |
|                | 80        | 95     | 95       | 95       | 95       | 95   |
|                | 90        | 95     | 95       | 95       | 95       | 95   |
